# Supplementary material for: Human Papillomavirus Vaccination and Human Papillomavirus–Related Cancer Rates
Source: PubMed Central journal article supplement (PMC11378004; doi:10.1001/jamanetworkopen.2024.31807), 2024-09-05
Supplement: jamanetwopen-e2431807-s001.pdf [file jamanetwopen-e2431807-s001.pdf]

## Supplemental Online Content

Adekanmbi V, Sokale I, Guo F, et al. Human papillomavirus vaccination and human papillomavirus–related cancer rates. *JAMA Netw Open*. 2024;7(9):e2431807.  
doi:10.1001/jamanetworkopen.2024.31807

**eFigure.** Map Showing Health Service Regions of Texas

**eTable 1.** Texas County-Level Estimates of HPV Metrics Among Female Individuals Aged 9 to 17 Years

**eTable 2.** Texas County-Level Estimates of HPV Metrics Among Male Individuals Aged 9 to 17 Years

**eTable 3.** Spearman Correlation Matrix Between HPV Vaccination Initiation, HPV Vaccination Up-to-Date Status, and HPV-Related Cancer Incidence Across All Counties for Female Individuals

**eTable 4.** Spearman Correlation Matrix Between HPV Vaccination Initiation, HPV Vaccination Up-to-Date Status, and HPV-Related Cancer Incidence Across All Counties for Male Individuals

This supplemental material has been provided by the authors to give readers additional information about their work.

eFigure. Map Showing Health Service Regions of Texas

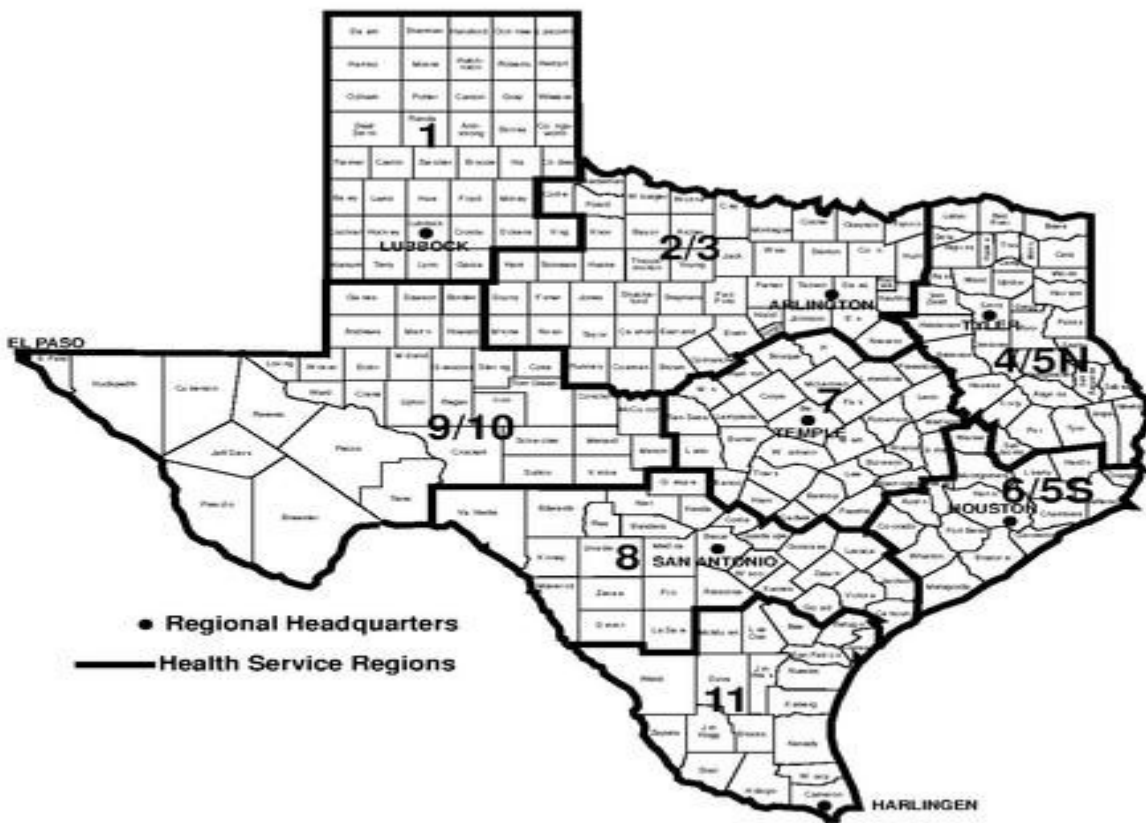

eTable 1. Texas County-Level Estimates of HPV Metrics Among Female Individuals Aged 9 to 17 Years

| County        | Proportion 9- to 17-year-olds who initiated the HPV vaccine 2021–2022 <sup>a</sup> | Proportion of 9- to 17-year-olds who were up to date for the HPV vaccine 2021–2022 <sup>a</sup> | HPV-related cancer incidence rate <sup>b</sup> |
|---------------|------------------------------------------------------------------------------------|-------------------------------------------------------------------------------------------------|------------------------------------------------|
| Anderson      | 35.2%                                                                              | 14.7%                                                                                           | 18.6                                           |
| Andrews       | 42.7%                                                                              | 24.5%                                                                                           | 21.6                                           |
| Angelina      | 44.4%                                                                              | 16.3%                                                                                           | 26.1                                           |
| Aransas       | 36.0%                                                                              | 14.0%                                                                                           | 21.9                                           |
| Archer        | 32.2%                                                                              | 10.5%                                                                                           | 21.0                                           |
| Armstrong     | 19.1%                                                                              | 8.8%                                                                                            | 61.1                                           |
| Atascosa      | 44.1%                                                                              | 18.8%                                                                                           | 18.4                                           |
| Austin        | 38.1%                                                                              | 17.3%                                                                                           | 17.2                                           |
| Bailey        | 30.6%                                                                              | 13.7%                                                                                           | 0                                              |
| Bandera       | 33.9%                                                                              | 16.4%                                                                                           | 19.8                                           |
| Bastrop       | 47.2%                                                                              | 19.7%                                                                                           | 12.9                                           |
| Baylor        | 46.1%                                                                              | 26.9%                                                                                           | 70.0                                           |
| Bee           | 51.6%                                                                              | 20.5%                                                                                           | 33.0                                           |
| Bell          | 29.0%                                                                              | 13.7%                                                                                           | 23.7                                           |
| Bexar         | 42.0%                                                                              | 18.5%                                                                                           | 18.3                                           |
| Blanco        | 30.7%                                                                              | 12.9%                                                                                           | 22.7                                           |
| Borden        | 41.0%                                                                              | 15.4%                                                                                           | 154.6                                          |
| Bosque        | 29.8%                                                                              | 15.8%                                                                                           | 34.7                                           |
| Bowie         | 24.4%                                                                              | 13.6%                                                                                           | 22.2                                           |
| Brazoria      | 44.0%                                                                              | 17.8%                                                                                           | 17.6                                           |
| Brazos        | 46.5%                                                                              | 19.6%                                                                                           | 14.8                                           |
| Brewster      | 30.0%                                                                              | 17.2%                                                                                           | 33.4                                           |
| Briscoe       | 59.1%                                                                              | 9.5%                                                                                            | 19.9                                           |
| Brooks        | 6.2%                                                                               | 1.6%                                                                                            | 15.4                                           |
| Brown         | 41.2%                                                                              | 19.4%                                                                                           | 21.6                                           |
| Burleson      | 46.3%                                                                              | 21.0%                                                                                           | 19.2                                           |
| Burnet        | 41.6%                                                                              | 17.6%                                                                                           | 22.6                                           |
| Caldwell      | 46.6%                                                                              | 20.9%                                                                                           | 16.6                                           |
| Calhoun       | 50.7%                                                                              | 17.2%                                                                                           | 26.7                                           |
| Callahan      | 40.0%                                                                              | 20.7%                                                                                           | 10.5                                           |
| Cameron       | 46.7%                                                                              | 15.7%                                                                                           | 18.0                                           |
| Camp          | 43.6%                                                                              | 19.2%                                                                                           | 14.6                                           |
| Carson        | 28.4%                                                                              | 13.2%                                                                                           | 30.3                                           |
| Cass          | 24.3%                                                                              | 11.5%                                                                                           | 22.4                                           |
| Castro        | 39.4%                                                                              | 12.9%                                                                                           | 17.5                                           |
| Chambers      | 41.7%                                                                              | 16.2%                                                                                           | 9.1                                            |
| Cherokee      | 39.2%                                                                              | 16.5%                                                                                           | 23.1                                           |
| Childress     | 31.9%                                                                              | 14.3%                                                                                           | 46.7                                           |
| Clay          | 31.8%                                                                              | 16.4%                                                                                           | 16.8                                           |
| Cochran       | 37.2%                                                                              | 18.8%                                                                                           | 24.6                                           |
| Coke          | 40.6%                                                                              | 19.7%                                                                                           | 35.3                                           |
| Coleman       | 44.0%                                                                              | 21.2%                                                                                           | 14.4                                           |
| Collin        | 23.6%                                                                              | 11.4%                                                                                           | 11.7                                           |
| Collingsworth | 18.9%                                                                              | 8.9%                                                                                            | 0                                              |
| Colorado      | 31.7%                                                                              | 16.3%                                                                                           | 35.3                                           |

|            |       |       |      |
|------------|-------|-------|------|
| Comal      | 34.2% | 15.3% | 19.4 |
| Comanche   | 40.6% | 16.7% | 38.2 |
| Concho     | 57.4% | 26.6% | 32.1 |
| Cooke      | 28.2% | 14.1% | 20.2 |
| Coryell    | 23.7% | 11.0% | 22.3 |
| Cottle     | 47.4% | 23.7% | 50.0 |
| Crane      | 35.0% | 20.2% | 11.4 |
| Crockett   | 31.2% | 14.6% | 44.4 |
| Crosby     | 44.7% | 17.3% | 26.4 |
| Culberson  | 46.1% | 28.1% | 0    |
| Dallam     | 25.4% | 15.5% | 22.1 |
| Dallas     | 37.3% | 18.5% | 18.3 |
| Dawson     | 20.6% | 11.7% | 8.5  |
| DeWitt     | 47.2% | 19.2% | 25.5 |
| Deaf Smith | 42.0% | 21.1% | 10.8 |
| Delta      | 33.0% | 17.1% | 28.9 |
| Denton     | 29.2% | 14.1% | 14.4 |
| Dickens    | 20.9% | 10.5% | 69.5 |
| Dimmit     | 69.4% | 30.4% | 20.1 |
| Donley     | 34.1% | 16.6% | 7.8  |
| Duval      | 62.9% | 22.7% | 19.6 |
| Eastland   | 26.1% | 10.5% | 25.2 |
| Ector      | 34.8% | 18.2% | 26.7 |
| Edwards    | 27.3% | 11.6% | 11.1 |
| El Paso    | 47.7% | 17.8% | 17.6 |
| Ellis      | 36.2% | 16.7% | 23.7 |
| Erath      | 25.9% | 12.1% | 22.9 |
| Falls      | 46.7% | 20.8% | 16.0 |
| Fannin     | 36.0% | 16.6% | 21.3 |
| Fayette    | 35.7% | 14.2% | 19.9 |
| Fisher     | 55.6% | 26.3% | 52.3 |
| Floyd      | 50.1% | 23.8% | 18.0 |
| Foard      | 16.9% | 10.8% | 19.3 |
| Fort Bend  | 43.4% | 17.6% | 12.8 |
| Franklin   | 43.0% | 17.2% | 5.8  |
| Freestone  | 30.2% | 13.7% | 29.2 |
| Frio       | 11.7% | 9.0%  | 25.3 |
| Gaines     | 21.7% | 11.3% | 9.6  |
| Galveston  | 45.8% | 16.3% | 20.5 |
| Garza      | 39.4% | 18.8% | 0    |
| Gillespie  | 26.4% | 11.2% | 19.0 |
| Glasscock  | 43.4% | 21.7% | 27.9 |
| Goliad     | 45.7% | 16.5% | 14.8 |
| Gonzales   | 40.3% | 21.9% | 17.8 |
| Gray       | 25.4% | 12.4% | 35.3 |
| Grayson    | 34.2% | 16.6% | 22.3 |
| Gregg      | 34.5% | 15.3% | 19.9 |
| Grimes     | 45.3% | 20.7% | 16.8 |
| Guadalupe  | 35.3% | 15.0% | 16.4 |
| Hale       | 39.2% | 19.9% | 24.1 |

|            |       |       |      |
|------------|-------|-------|------|
| Hall       | 36.3% | 15.4% | 30.5 |
| Hamilton   | 33.3% | 17.8% | 3.9  |
| Hansford   | 26.9% | 12.9% | 29.6 |
| Hardeman   | 38.4% | 20.3% | 0    |
| Hardin     | 25.9% | 14.1% | 13.5 |
| Harris     | 45.3% | 18.0% | 17.3 |
| Harrison   | 39.7% | 17.3% | 23.2 |
| Hartley    | 26.1% | 16.7% | 15.4 |
| Haskell    | 38.8% | 19.3% | 58.8 |
| Hays       | 42.2% | 17.3% | 18.4 |
| Hemphill   | 28.1% | 15.8% | 16.9 |
| Henderson  | 33.1% | 15.4% | 30.1 |
| Hidalgo    | 40.4% | 16.8% | 20.2 |
| Hill       | 33.0% | 17.8% | 34.7 |
| Hockley    | 34.5% | 17.5% | 21.2 |
| Hood       | 37.9% | 15.9% | 24.4 |
| Hopkins    | 35.1% | 14.4% | 22.4 |
| Houston    | 37.9% | 15.2% | 15.8 |
| Howard     | 33.1% | 18.0% | 21.7 |
| Hudspeth   | 50.5% | 17.1% | 28.5 |
| Hunt       | 38.2% | 16.6% | 13.9 |
| Hutchinson | 23.1% | 9.5%  | 30.8 |
| Irion      | 35.5% | 14.0% | 43.3 |
| Jack       | 32.5% | 13.3% | 30.3 |
| Jackson    | 48.7% | 20.0% | 24.3 |
| Jasper     | 23.7% | 13.0% | 26.6 |
| Jeff Davis | 34.0% | 23.6% | 0    |
| Jefferson  | 35.2% | 16.0% | 19.7 |
| Jim Hogg   | 56.5% | 23.3% | 9.0  |
| Jim Wells  | 59.6% | 20.4% | 26.2 |
| Johnson    | 32.3% | 17.2% | 21.6 |
| Jones      | 49.9% | 22.7% | 28.3 |
| Karnes     | 33.3% | 19.3% | 9.9  |
| Kaufman    | 35.2% | 16.7% | 22.4 |
| Kendall    | 27.4% | 12.9% | 14.9 |
| Kenedy     | 53.3% | 16.7% | 0    |
| Kent       | 30.4% | 23.2% | 45.4 |
| Kerr       | 37.3% | 17.4% | 18.7 |
| Kimble     | 38.3% | 20.6% | 10.6 |
| King       | 13.8% | 6.9%  | 0    |
| Kinney     | 33.5% | 18.0% | 22.3 |
| Kleberg    | 53.2% | 16.9% | 32.5 |
| Knox       | 47.3% | 26.1% | 0    |
| La Salle   | 36.3% | 19.4% | 6.5  |
| Lamar      | 44.6% | 20.0% | 18.4 |
| Lamb       | 37.4% | 15.3% | 24.8 |
| Lampasas   | 28.1% | 13.9% | 40.4 |
| Lavaca     | 46.7% | 20.6% | 13.2 |
| Lee        | 48.6% | 15.2% | 20.2 |
| Leon       | 37.9% | 18.2% | 26.6 |

|             |       |       |      |
|-------------|-------|-------|------|
| Liberty     | 37.5% | 16.5% | 24.7 |
| Limestone   | 38.2% | 16.8% | 22.0 |
| Lipscomb    | 26.3% | 10.7% | 22.0 |
| Live Oak    | 43.6% | 20.4% | 38.1 |
| Llano       | 40.1% | 18.0% | 16.9 |
| Loving      | .     | .     | 0    |
| Lubbock     | 43.9% | 17.5% | 19.6 |
| Lynn        | 38.8% | 12.9% | 25.9 |
| Madison     | 44.8% | 20.8% | 17.1 |
| Marion      | 34.4% | 12.8% | 36.4 |
| Martin      | 27.9% | 17.8% | 15.4 |
| Mason       | 39.8% | 18.8% | 18.5 |
| Matagorda   | 50.5% | 20.2% | 17.9 |
| Maverick    | 35.8% | 14.1% | 20.5 |
| McCulloch   | 40.1% | 16.8% | 34.2 |
| McLennan    | 46.6% | 20.1% | 19.5 |
| McMullen    | 38.3% | 25.5% | 46.5 |
| Medina      | 42.3% | 20.2% | 18.6 |
| Menard      | 50.0% | 16.7% | 48.7 |
| Midland     | 32.4% | 16.1% | 20.3 |
| Milam       | 47.9% | 19.5% | 22.2 |
| Mills       | 44.9% | 16.0% | 17.1 |
| Mitchell    | 41.7% | 23.8% | 55.1 |
| Montague    | 21.1% | 9.8%  | 19.0 |
| Montgomery  | 35.3% | 15.0% | 17.0 |
| Moore       | 19.7% | 10.5% | 9.8  |
| Morris      | 41.0% | 14.7% | 29.2 |
| Motley      | 50.9% | 23.6% | 92.9 |
| Nacogdoches | 32.5% | 13.8% | 20.2 |
| Navarro     | 31.8% | 16.1% | 19.7 |
| Newton      | 20.3% | 11.4% | 30.8 |
| Nolan       | 53.2% | 23.9% | 27.6 |
| Nueces      | 52.6% | 19.4% | 15.5 |
| Ochiltree   | 22.4% | 10.9% | 12.6 |
| Oldham      | 33.3% | 9.5%  | 19.1 |
| Orange      | 26.9% | 13.1% | 21.8 |
| Palo Pinto  | 28.4% | 13.8% | 21.1 |
| Panola      | 18.1% | 9.1%  | 21.0 |
| Parker      | 32.4% | 15.1% | 22.1 |
| Parmer      | 25.8% | 11.2% | 4.2  |
| Pecos       | 51.8% | 23.2% | 30.7 |
| Polk        | 39.7% | 17.4% | 35.8 |
| Potter      | 36.3% | 15.3% | 23.8 |
| Presidio    | 36.8% | 21.1% | 18.6 |
| Rains       | 32.9% | 13.1% | 20.3 |
| Randall     | 29.4% | 11.7% | 20.5 |
| Reagan      | 33.6% | 13.1% | 0    |
| Real        | 37.5% | 12.9% | 15.4 |
| Red River   | 42.8% | 18.4% | 34.3 |
| Reeves      | 47.9% | 8.4%  | 26.6 |

|               |       |       |       |
|---------------|-------|-------|-------|
| Refugio       | 46.9% | 23.6% | 10.9  |
| Roberts       | 21.1% | 10.5% | 128.3 |
| Robertson     | 50.6% | 22.4% | 24.8  |
| Rockwall      | 27.9% | 13.1% | 15.5  |
| Runnels       | 49.4% | 23.3% | 33.4  |
| Rusk          | 34.0% | 14.8% | 14.8  |
| Sabine        | 20.0% | 11.2% | 21.1  |
| San Augustine | 28.0% | 14.2% | 3.0   |
| San Jacinto   | 34.9% | 18.0% | 16.2  |
| San Patricio  | 48.1% | 17.5% | 24.5  |
| San Saba      | 44.0% | 18.4% | 21.1  |
| Schleicher    | 29.0% | 14.7% | 23.6  |
| Scurry        | 47.5% | 26.2% | 29.5  |
| Shackelford   | 34.4% | 17.9% | 0     |
| Shelby        | 21.7% | 12.3% | 11.7  |
| Sherman       | 23.0% | 11.1% | 0     |
| Smith         | 37.9% | 17.7% | 19.8  |
| Somervell     | 29.1% | 14.2% | 17.2  |
| Starr         | 31.0% | 12.6% | 19.6  |
| Stephens      | 41.9% | 17.8% | 15.4  |
| Sterling      | 40.1% | 13.9% | 33.1  |
| Stonewall     | 45.7% | 14.3% | 0     |
| Sutton        | 40.5% | 17.7% | 0     |
| Swisher       | 42.4% | 24.0% | 12.6  |
| Tarrant       | 36.1% | 18.2% | 18.4  |
| Taylor        | 39.3% | 17.4% | 22.2  |
| Terrell       | 28.6% | 14.3% | 0     |
| Terry         | 36.9% | 18.5% | 16.3  |
| Throckmorton  | 45.5% | 22.2% | 0     |
| Titus         | 49.2% | 18.4% | 25.4  |
| Tom Green     | 47.6% | 16.8% | 20.2  |
| Travis        | 41.5% | 17.2% | 14.2  |
| Trinity       | 43.4% | 21.1% | 25.2  |
| Tyler         | 31.9% | 15.8% | 37.8  |
| Upshur        | 33.4% | 15.6% | 20.2  |
| Upton         | 42.6% | 25.9% | 0     |
| Uvalde        | 43.6% | 17.1% | 16.9  |
| Val Verde     | 30.3% | 14.5% | 14.2  |
| Van Zandt     | 34.8% | 15.6% | 25.4  |
| Victoria      | 52.0% | 16.3% | 23.9  |
| Walker        | 32.3% | 16.1% | 28.8  |
| Waller        | 38.6% | 17.6% | 31.6  |
| Ward          | 21.5% | 13.5% | 34.6  |
| Washington    | 46.9% | 17.6% | 14.6  |
| Webb          | 39.0% | 14.9% | 16.2  |
| Wharton       | 52.6% | 20.1% | 17.3  |
| Wheeler       | 26.8% | 13.4% | 6.2   |
| Wichita       | 30.9% | 12.4% | 32.8  |
| Wilbarger     | 38.4% | 19.2% | 30.4  |
| Willacy       | 50.3% | 20.4% | 20.1  |

|            |       |       |       |
|------------|-------|-------|-------|
| Williamson | 37.3% | 16.0% | 14.6  |
| Wilson     | 32.7% | 14.8% | 21.5  |
| Winkler    | 29.5% | 18.5% | 0     |
| Wise       | 28.5% | 13.6% | 26.1  |
| Wood       | 32.3% | 15.0% | 12.4  |
| Yoakum     | 18.8% | 10.9% | 16.1. |
| Young      | 29.9% | 13.1% | 32.6  |
| Zapata     | 47.8% | 22.3% | 9.0   |
| Zavala     | 41.9% | 26.7% | 25.6  |

<sup>a</sup>Average percent of 2021 and 2022 Texas Immunization Registry count divided by census population for 9–17-year-olds, <sup>b</sup>2021–2022 annualized adjusted HPV cancer incidence rate per 100,000 population, adjusted by 2000 US population.

HPV, human papillomavirus.



eTable 2. Texas County-Level Estimates of HPV Metrics Among Male Individuals Aged 9 to 17 Years

| County        | Average percent of 9- to 17-year-olds who initiated the HPV vaccine 2021–2022 <sup>a</sup> | Average percent of 9- to 17-year-olds who were up to date for the HPV vaccine 2021–2022 <sup>a</sup> | HPV-related cancer incidence rate <sup>b</sup> |
|---------------|--------------------------------------------------------------------------------------------|------------------------------------------------------------------------------------------------------|------------------------------------------------|
| Anderson      | 28.2%                                                                                      | 12.2%                                                                                                | 12.8                                           |
| Andrews       | 37.3%                                                                                      | 19.9%                                                                                                | 11.1                                           |
| Angelina      | 41.7%                                                                                      | 16.3%                                                                                                | 13.6                                           |
| Aransas       | 32.7%                                                                                      | 13.8%                                                                                                | 20.0                                           |
| Archer        | 26.8%                                                                                      | 12.5%                                                                                                | 7.9                                            |
| Armstrong     | 21.6%                                                                                      | 5.0%                                                                                                 | 30.8                                           |
| Atascosa      | 40.7%                                                                                      | 17.5%                                                                                                | 10.5                                           |
| Austin        | 37.8%                                                                                      | 17.3%                                                                                                | 14.5                                           |
| Bailey        | 33.5%                                                                                      | 15.8%                                                                                                | 13.0                                           |
| Bandera       | 30.5%                                                                                      | 13.5%                                                                                                | 17.4                                           |
| Bastrop       | 43.8%                                                                                      | 17.7%                                                                                                | 13.0                                           |
| Baylor        | 44.3%                                                                                      | 23.2%                                                                                                | 27.8                                           |
| Bee           | 47.3%                                                                                      | 19.0%                                                                                                | 20.6                                           |
| Bell          | 27.6%                                                                                      | 13.2%                                                                                                | 14.9                                           |
| Bexar         | 40.1%                                                                                      | 17.6%                                                                                                | 11.8                                           |
| Blanco        | 28.0%                                                                                      | 12.3%                                                                                                | 14.3                                           |
| Borden        | 25.4%                                                                                      | 19.0%                                                                                                | 50.9                                           |
| Bosque        | 26.9%                                                                                      | 13.3%                                                                                                | 11.8                                           |
| Bowie         | 22.5%                                                                                      | 12.5%                                                                                                | 18.3                                           |
| Brazoria      | 41.5%                                                                                      | 17.0%                                                                                                | 13.7                                           |
| Brazos        | 44.3%                                                                                      | 19.4%                                                                                                | 13.8                                           |
| Brewster      | 23.0%                                                                                      | 12.6%                                                                                                | 5.9                                            |
| Briscoe       | 47.4%                                                                                      | 11.7%                                                                                                | 0                                              |
| Brooks        | 6.9%                                                                                       | 2.1%                                                                                                 | 0                                              |
| Brown         | 37.1%                                                                                      | 18.9%                                                                                                | 14.1                                           |
| Burleson      | 44.3%                                                                                      | 18.2%                                                                                                | 9.8                                            |
| Burnet        | 40.8%                                                                                      | 17.4%                                                                                                | 15.3                                           |
| Caldwell      | 43.9%                                                                                      | 18.8%                                                                                                | 19.5                                           |
| Calhoun       | 49.4%                                                                                      | 18.0%                                                                                                | 12.1                                           |
| Callahan      | 38.2%                                                                                      | 19.5%                                                                                                | 96                                             |
| Cameron       | 46.5%                                                                                      | 14.4%                                                                                                | 10.2                                           |
| Camp          | 40.9%                                                                                      | 16.5%                                                                                                | 25.4                                           |
| Carson        | 22.4%                                                                                      | 13.1%                                                                                                | 4.5                                            |
| Cass          | 22.5%                                                                                      | 11.3%                                                                                                | 11.7                                           |
| Castro        | 34.6%                                                                                      | 14.7%                                                                                                | 8.9                                            |
| Chambers      | 39.7%                                                                                      | 15.3%                                                                                                | 18.1                                           |
| Cherokee      | 38.3%                                                                                      | 17.4%                                                                                                | 18.6                                           |
| Childress     | 26.6%                                                                                      | 14.0%                                                                                                | 5.8                                            |
| Clay          | 28.9%                                                                                      | 11.8%                                                                                                | 21.3                                           |
| Cochran       | 28.3%                                                                                      | 11.0%                                                                                                | 0                                              |
| Coke          | 46.5%                                                                                      | 19.1%                                                                                                | 30.6                                           |
| Coleman       | 37.4%                                                                                      | 19.3%                                                                                                | 13.5                                           |
| Collin        | 21.6%                                                                                      | 10.5%                                                                                                | 12.2                                           |
| Collingsworth | 19.8%                                                                                      | 12.5%                                                                                                | 10.6                                           |
| Colorado      | 32.1%                                                                                      | 17.0%                                                                                                | 18.7                                           |

|            |       |       |      |
|------------|-------|-------|------|
| Comal      | 32.6% | 14.7% | 17.2 |
| Comanche   | 38.2% | 16.8% | 9.6  |
| Concho     | 37.4% | 14.6% | 8.5  |
| Cooke      | 25.8% | 12.8% | 8.7  |
| Coryell    | 20.9% | 10.2% | 16.9 |
| Cottle     | 56.5% | 34.8% | 45.9 |
| Crane      | 39.9% | 22.2% | 0    |
| Crockett   | 27.4% | 16.4% | 0    |
| Crosby     | 38.8% | 16.8% | 10.7 |
| Culberson  | 41.4% | 22.2% | 60.6 |
| Dallam     | 21.1% | 13.3% | 12.9 |
| Dallas     | 35.3% | 18.0% | 14.6 |
| Dawson     | 16.9% | 10.7% | 17.0 |
| DeWitt     | 43.2% | 18.9% | 9.4  |
| Deaf Smith | 34.4% | 17.7% | 10.0 |
| Delta      | 32.6% | 11.9% | 35.7 |
| Denton     | 27.4% | 13.5% | 12.1 |
| Dickens    | 16.0% | 11.8% | 0    |
| Dimmit     | 77.8% | 24.6% | 7.6  |
| Donley     | 12.6% | 8.0%  | 19.0 |
| Duval      | 63.1% | 21.8% | 26.6 |
| Eastland   | 25.6% | 12.5% | 9.1  |
| Ector      | 31.9% | 17.4% | 10.9 |
| Edwards    | 28.1% | 14.4% | 0    |
| El Paso    | 46.2% | 17.5% | 8.7  |
| Ellis      | 35.4% | 16.5% | 14.1 |
| Erath      | 25.6% | 12.1% | 12.8 |
| Falls      | 45.7% | 23.5% | 11.9 |
| Fannin     | 31.6% | 14.4% | 10.0 |
| Fayette    | 32.5% | 13.5% | 11.6 |
| Fisher     | 54.5% | 28.1% | 31.2 |
| Floyd      | 47.3% | 22.3% | 17.0 |
| Foard      | 22.8% | 14.0% | 0    |
| Fort Bend  | 41.6% | 17.1% | 10.6 |
| Franklin   | 39.4% | 13.9% | 12.6 |
| Freestone  | 30.2% | 15.9% | 13.3 |
| Frio       | 11.6% | 9.4%  | 7.1  |
| Gaines     | 21.5% | 10.9% | 9.6  |
| Galveston  | 43.0% | 15.1% | 20.8 |
| Garza      | 34.6% | 18.4% | 0    |
| Gillespie  | 22.2% | 10.6% | 11.0 |
| Glasscock  | 39.7% | 18.4% | 0    |
| Goliad     | 40.5% | 15.0% | 13.5 |
| Gonzales   | 38.1% | 19.4% | 7.3  |
| Gray       | 23.7% | 12.5% | 18.6 |
| Grayson    | 31.8% | 16.2% | 17.4 |
| Gregg      | 32.6% | 14.4% | 17.4 |
| Grimes     | 44.4% | 21.3% | 19.4 |
| Guadalupe  | 33.6% | 14.8% | 13.5 |
| Hale       | 37.0% | 21.3% | 11.5 |

|            |       |       |      |
|------------|-------|-------|------|
| Hall       | 28.9% | 11.4% | 0    |
| Hamilton   | 27.6% | 15.6% | 13.2 |
| Hansford   | 27.2% | 14.3% | 20.2 |
| Hardeman   | 48.0% | 27.0% | 60.1 |
| Hardin     | 24.3% | 13.6% | 16.9 |
| Harris     | 43.7% | 17.6% | 12.0 |
| Harrison   | 35.0% | 16.1% | 19.5 |
| Hartley    | 17.5% | 11.5% | 0    |
| Haskell    | 49.9% | 25.3% | 11.0 |
| Hays       | 40.4% | 18.1% | 13.8 |
| Hemphill   | 22.6% | 15.6% | 0    |
| Henderson  | 30.7% | 14.7% | 23.4 |
| Hidalgo    | 38.2% | 16.7% | 8.0  |
| Hill       | 29.5% | 16.1% | 27.9 |
| Hockley    | 30.7% | 15.4% | 19.9 |
| Hood       | 34.5% | 13.6% | 23.8 |
| Hopkins    | 36.2% | 17.7% | 12.9 |
| Houston    | 35.6% | 15.0% | 13.8 |
| Howard     | 32.8% | 17.5% | 11.4 |
| Hudspeth   | 52.9% | 18.1% | 18.6 |
| Hunt       | 37.0% | 16.4% | 18.6 |
| Hutchinson | 17.2% | 9.3%  | 10.6 |
| Irion      | 35.7% | 15.7% | 0    |
| Jack       | 29.2% | 11.8% | 19.6 |
| Jackson    | 48.6% | 19.8% | 6.3  |
| Jasper     | 19.6% | 11.1% | 11.0 |
| Jeff Davis | 25.8% | 18.0% | 0    |
| Jefferson  | 30.9% | 13.9% | 14.2 |
| Jim Hogg   | 57.6% | 23.0% | 30.4 |
| Jim Wells  | 55.8% | 20.4% | 11.3 |
| Johnson    | 29.0% | 15.6% | 13.1 |
| Jones      | 44.4% | 19.3% | 11.6 |
| Karnes     | 31.2% | 21.2% | 14.8 |
| Kaufman    | 32.8% | 16.1% | 16.0 |
| Kendall    | 25.1% | 10.8% | 12.0 |
| Kenedy     | 48.4% | 12.9% | 0    |
| Kent       | 25.0% | 8.3%  | 38.6 |
| Kerr       | 37.2% | 18.1% | 18.7 |
| Kimble     | 36.5% | 19.4% | 10.9 |
| King       | 33.3% | 11.1% | 0    |
| Kinney     | 35.8% | 15.5% | 7.4  |
| Kleberg    | 51.4% | 17.8% | 15.8 |
| Knox       | 48.0% | 21.6% | 10.0 |
| La Salle   | 31.3% | 15.5% | 6.0  |
| Lamar      | 39.8% | 18.0% | 16.2 |
| Lamb       | 39.2% | 19.6% | 17.5 |
| Lampasas   | 25.2% | 14.5% | 13.6 |
| Lavaca     | 43.3% | 20.1% | 15.6 |
| Lee        | 49.4% | 18.8% | 9.7  |
| Leon       | 32.6% | 14.9% | 9.7  |

|             |       |       |      |
|-------------|-------|-------|------|
| Liberty     | 34.7% | 16.1% | 13.6 |
| Limestone   | 38.8% | 18.2% | 18.0 |
| Lipscomb    | 25.5% | 7.6%  | 0    |
| Live Oak    | 45.8% | 21.7% | 20.4 |
| Llano       | 42.0% | 18.3% | 23.7 |
| Loving      | -     | -     | 0    |
| Lubbock     | 40.6% | 16.6% | 11.6 |
| Lynn        | 41.0% | 19.1% | 22.8 |
| Madison     | 43.4% | 20.2% | 7.3  |
| Marion      | 30.4% | 14.4% | 27.3 |
| Martin      | 28.7% | 15.1% | 45.4 |
| Mason       | 28.0% | 13.1% | 5.3  |
| Matagorda   | 48.3% | 18.5% | 17.1 |
| Maverick    | 35.3% | 15.0% | 4.6  |
| McCulloch   | 30.8% | 14.7% | 26.9 |
| McLennan    | 43.5% | 19.2% | 17.8 |
| McMullen    | 22.7% | 4.5%  | 0    |
| Medina      | 38.2% | 19.3% | 6.0  |
| Menard      | 43.3% | 17.2% | 0    |
| Midland     | 30.4% | 16.3% | 12.2 |
| Milam       | 46.2% | 18.4% | 19.8 |
| Mills       | 41.5% | 17.8% | 6.4  |
| Mitchell    | 41.0% | 22.2% | 0    |
| Montague    | 17.1% | 8.4%  | 17.8 |
| Montgomery  | 33.6% | 14.4% | 14.0 |
| Moore       | 18.9% | 9.2%  | 1.9  |
| Morris      | 41.6% | 16.7% | 22.3 |
| Motley      | 32.9% | 30.0% | 22.2 |
| Nacogdoches | 29.0% | 12.3% | 11.7 |
| Navarro     | 29.6% | 15.8% | 19.6 |
| Newton      | 16.1% | 9.4%  | 11.7 |
| Nolan       | 54.7% | 25.7% | 6.7  |
| Nueces      | 50.8% | 19.7% | 13.9 |
| Ochiltree   | 19.9% | 10.7% | 7.0  |
| Oldham      | 29.7% | 12.0% | 0    |
| Orange      | 23.1% | 11.2% | 21.6 |
| Palo Pinto  | 24.0% | 11.1% | 29.0 |
| Panola      | 15.0% | 7.0%  | 14.1 |
| Parker      | 30.1% | 14.7% | 17.1 |
| Parmer      | 24.4% | 11.5% | 4.2  |
| Pecos       | 44.3% | 21.7% | 3.1  |
| Polk        | 37.4% | 18.9% | 23.1 |
| Potter      | 32.0% | 14.3% | 19.8 |
| Presidio    | 36.2% | 20.5% | 0    |
| Rains       | 29.4% | 12.7% | 6.5  |
| Randall     | 27.3% | 11.7% | 12.5 |
| Reagan      | 33.1% | 12.5% | 22.5 |
| Real        | 29.7% | 16.4% | 12.9 |
| Red River   | 38.0% | 18.7% | 5.1  |
| Reeves      | 48.9% | 5.7%  | 14.6 |

|               |       |       |      |
|---------------|-------|-------|------|
| Refugio       | 49.4% | 21.6% | 0    |
| Roberts       | 22.5% | 15.5% | 0    |
| Robertson     | 45.7% | 19.0% | 11.2 |
| Rockwall      | 25.0% | 11.6% | 17.8 |
| Runnels       | 46.8% | 22.7% | 35.1 |
| Rusk          | 26.9% | 13.5% | 14.5 |
| Sabine        | 14.6% | 10.1% | 30.3 |
| San Augustine | 24.4% | 11.7% | 18.3 |
| San Jacinto   | 30.3% | 14.2% | 25.0 |
| San Patricio  | 46.6% | 17.7% | 16.9 |
| San Saba      | 40.2% | 22.8% | 8.7  |
| Schleicher    | 30.6% | 13.6% | 13.9 |
| Scurry        | 45.8% | 26.3% | 5.9  |
| Shackelford   | 36.9% | 15.4% | 46.0 |
| Shelby        | 18.0% | 9.2%  | 7.7  |
| Sherman       | 22.8% | 9.0%  | 0    |
| Smith         | 36.6% | 18.2% | 14.4 |
| Somervell     | 28.5% | 13.6% | 16.3 |
| Starr         | 29.1% | 12.7% | 5.9  |
| Stephens      | 37.0% | 18.7% | 17.4 |
| Sterling      | 35.2% | 20.5% | 62.5 |
| Stonewall     | 38.0% | 14.1% | 64.9 |
| Sutton        | 36.9% | 18.4% | 0    |
| Swisher       | 40.0% | 20.7% | 9.5  |
| Tarrant       | 34.3% | 17.5% | 15.1 |
| Taylor        | 38.8% | 17.2% | 16.3 |
| Terrell       | 15.3% | 8.5%  | 35.5 |
| Terry         | 35.4% | 18.3% | 90.0 |
| Throckmorton  | 37.0% | 14.0% | 16.0 |
| Titus         | 48.2% | 18.0% | 10.3 |
| Tom Green     | 46.2% | 16.9% | 13.7 |
| Travis        | 39.7% | 17.2% | 13.6 |
| Trinity       | 42.4% | 21.1% | 24.2 |
| Tyler         | 27.7% | 14.4% | 24.7 |
| Upshur        | 28.4% | 14.0% | 20.7 |
| Upton         | 42.8% | 27.0% | 0    |
| Uvalde        | 39.5% | 19.2% | 14.2 |
| Val Verde     | 27.0% | 14.4% | 7.1  |
| Van Zandt     | 29.9% | 13.8% | 15.1 |
| Victoria      | 51.4% | 17.2% | 16.5 |
| Walker        | 29.8% | 15.2% | 22.6 |
| Waller        | 38.7% | 18.1% | 16.6 |
| Ward          | 21.0% | 13.2% | 6.8  |
| Washington    | 42.5% | 16.8% | 15.0 |
| Webb          | 37.4% | 14.5% | 7.5  |
| Wharton       | 51.0% | 21.2% | 12.2 |
| Wheeler       | 22.6% | 13.5% | 13.7 |
| Wichita       | 27.6% | 11.3% | 13.9 |
| Wilbarger     | 33.6% | 18.6% | 3.0  |
| Willacy       | 53.1% | 34.9% | 5.1  |

|            |       |       |      |
|------------|-------|-------|------|
| Williamson | 35.4% | 15.5% | 13.4 |
| Wilson     | 30.9% | 15.2% | 7.8  |
| Winkler    | 25.4% | 13.3% | 4.6  |
| Wise       | 25.5% | 11.7% | 11.1 |
| Wood       | 30.4% | 14.7% | 16.8 |
| Yoakum     | 12.6% | 6.8%  | 17.2 |
| Young      | 25.0% | 15.0% | 28.7 |
| Zapata     | 45.9% | 21.6% | 7.2  |
| Zavala     | 42.7% | 28.4% | 12.7 |

<sup>a</sup>Average percent of 2021 and 2022 Texas Immunization Registry count divided by census population for 9–17-year-olds, <sup>b</sup>2021–2022 annualized adjusted HPV cancer incidence rate per 100,000 population, adjusted by 2000 US population.  
 HPV, human papillomavirus.

eTable 3. Spearman Correlation Matrix Between HPV Vaccination Initiation, HPV Vaccination Up-to-Date Status, and HPV-Related Cancer Incidence Across All Counties for Female Individuals

| County    | pctini | pctutd | rate  | pctini_rank | pctutd_rank | rate_rank |
|-----------|--------|--------|-------|-------------|-------------|-----------|
| Anderson  | 35.2%  | 14.7%  | 18.6  | 146         | 175         | 151       |
| Andrews   | 42.7%  | 24.5%  | 21.6  | 75          | 11          | 110       |
| Angelina  | 44.4%  | 16.3%  | 26.1  | 61          | 140         | 64        |
| Aransas   | 36.0%  | 14.0%  | 21.9  | 137         | 190         | 105       |
| Archer    | 32.2%  | 10.5%  | 21.0  | 181         | 240         | 118       |
| Armstrong | 19.1%  | 8.8%   | 61.1  | 246         | 250         | 5         |
| Atascosa  | 44.1%  | 18.8%  | 18.4  | 62          | 68          | 155       |
| Austin    | 38.1%  | 17.3%  | 17.2  | 118         | 109         | 169       |
| Bailey    | 30.6%  | 13.7%  | 0.0   | 191         | 196         | 245       |
| Bandera   | 33.9%  | 16.4%  | 19.8  | 161         | 137         | 135       |
| Bastrop   | 47.2%  | 19.7%  | 12.9  | 39          | 56.5        | 208       |
| Baylor    | 46.1%  | 26.9%  | 6.9   | 49          | 3           | 229       |
| Bee       | 51.6%  | 20.5%  | 33.0  | 15          | 43          | 33        |
| Bell      | 29.0%  | 13.7%  | 23.7  | 203         | 195         | 84        |
| Bexar     | 42.0%  | 18.5%  | 18.3  | 80          | 72          | 159       |
| Blanco    | 30.7%  | 12.9%  | 22.7  | 190         | 212         | 90        |
| Borden    | 41.0%  | 15.4%  | 154.2 | 89          | 158.5       | 1         |
| Bosque    | 29.8%  | 15.8%  | 34.7  | 197         | 150         | 25        |
| Bowie     | 24.4%  | 13.6%  | 22.3  | 228         | 198         | 98        |
| Brazoria  | 44.0%  | 17.8%  | 17.6  | 63          | 90          | 164       |
| Brazos    | 46.5%  | 19.6%  | 14.8  | 47          | 58          | 195       |
| Brewster  | 30.0%  | 17.2%  | 33.4  | 195         | 112         | 31        |
| Briscoe   | 59.1%  | 9.5%   | 19.9  | 4           | 246         | 133       |
| Brooks    | 6.2%   | 1.6%   | 15.4  | 253         | 253         | 192       |
| Brown     | 41.2%  | 19.4%  | 21.7  | 88          | 61          | 108       |
| Burleson  | 46.3%  | 21.0%  | 19.2  | 48          | 35          | 145       |
| Burnet    | 41.6%  | 17.6%  | 22.6  | 86          | 99          | 91        |
| Caldwell  | 46.6%  | 20.9%  | 16.6  | 46          | 36          | 179       |
| Calhoun   | 50.7%  | 17.2%  | 26.7  | 17          | 110         | 58        |
| Callahan  | 40.0%  | 20.7%  | 10.5  | 99          | 39          | 220       |
| Cameron   | 46.7%  | 15.7%  | 18.0  | 44          | 153         | 161       |
| Camp      | 43.6%  | 19.2%  | 14.5  | 68          | 67          | 199       |
| Carson    | 28.4%  | 13.2%  | 30.3  | 206         | 203         | 45        |
| Cass      | 24.3%  | 11.5%  | 22.3  | 229         | 225         | 94        |
| Castro    | 39.4%  | 12.9%  | 17.5  | 103         | 213         | 166       |
| Chambers  | 41.7%  | 16.2%  | 9.1   | 84          | 142         | 224       |
| Cherokee  | 39.2%  | 16.5%  | 23.1  | 107         | 133         | 88        |
| Childress | 31.9%  | 14.3%  | 46.7  | 183         | 181         | 11        |
| Clay      | 31.8%  | 16.4%  | 16.8  | 184         | 136         | 177       |
| Cochran   | 37.2%  | 18.8%  | 24.6  | 129         | 70          | 77        |

|               |       |       |      |     |       |     |
|---------------|-------|-------|------|-----|-------|-----|
| Coke          | 40.6% | 19.7% | 35.3 | 91  | 56.5  | 23  |
| Coleman       | 44.0% | 21.2% | 14.4 | 64  | 31    | 201 |
| Collin        | 23.6% | 11.4% | 11.6 | 232 | 226   | 214 |
| Collingsworth | 18.9% | 8.9%  | 0.0  | 247 | 249   | 245 |
| Colorado      | 31.7% | 16.3% | 35.3 | 186 | 138   | 22  |
| Comal         | 34.2% | 15.3% | 19.4 | 157 | 162   | 143 |
| Comanche      | 40.6% | 16.7% | 38.2 | 92  | 125   | 17  |
| Concho        | 57.4% | 26.6% | 32.1 | 5   | 5     | 37  |
| Cooke         | 28.2% | 14.1% | 20.2 | 208 | 188   | 130 |
| Coryell       | 23.7% | 11.0% | 22.3 | 230 | 233   | 95  |
| Cottle        | 47.4% | 23.7% | 50.0 | 36  | 16    | 9   |
| Crane         | 35.0% | 20.2% | 11.4 | 148 | 48    | 215 |
| Crockett      | 31.2% | 14.6% | 44.4 | 187 | 176   | 14  |
| Crosby        | 44.7% | 17.3% | 26.4 | 59  | 108   | 62  |
| Culberson     | 46.1% | 28.1% | 0.0  | 50  | 2     | 245 |
| Dallam        | 25.4% | 15.5% | 22.1 | 227 | 156   | 102 |
| Dallas        | 37.3% | 18.5% | 18.3 | 127 | 74    | 158 |
| Dawson        | 20.6% | 11.7% | 8.5  | 242 | 222   | 227 |
| DeWitt        | 47.2% | 19.2% | 25.5 | 38  | 66    | 68  |
| Deaf Smith    | 42.0% | 21.1% | 10.8 | 81  | 34    | 218 |
| Delta         | 33.0% | 17.1% | 28.9 | 170 | 116   | 51  |
| Denton        | 29.2% | 14.1% | 14.4 | 200 | 187   | 202 |
| Dickens       | 20.9% | 10.5% | 69.5 | 241 | 241   | 4   |
| Dimmit        | 69.4% | 30.4% | 20.1 | 1   | 1     | 131 |
| Donley        | 34.1% | 16.6% | 7.8  | 158 | 130   | 228 |
| Duval         | 62.9% | 22.7% | 19.6 | 2   | 24    | 141 |
| Eastland      | 26.1% | 10.5% | 25.2 | 222 | 239   | 73  |
| Ector         | 34.8% | 18.2% | 26.7 | 150 | 79    | 57  |
| Edwards       | 27.3% | 11.6% | 11.1 | 215 | 224   | 216 |
| El Paso       | 47.7% | 17.8% | 17.6 | 33  | 93    | 165 |
| Ellis         | 36.2% | 16.7% | 23.7 | 135 | 123.5 | 85  |
| Erath         | 25.9% | 12.1% | 22.9 | 223 | 221   | 89  |
| Falls         | 46.7% | 20.8% | 16.0 | 42  | 38    | 185 |
| Fannin        | 36.0% | 16.6% | 21.3 | 138 | 129   | 112 |
| Fayette       | 35.7% | 14.2% | 19.9 | 140 | 184   | 132 |
| Fisher        | 55.6% | 26.3% | 52.3 | 7   | 6     | 8   |
| Floyd         | 50.1% | 23.8% | 18.0 | 22  | 14    | 160 |
| Foard         | 16.9% | 10.8% | 19.3 | 250 | 236   | 144 |
| Fort Bend     | 43.4% | 17.6% | 12.8 | 70  | 96    | 209 |
| Franklin      | 43.0% | 17.2% | 5.8  | 73  | 114   | 232 |
| Freestone     | 30.2% | 13.7% | 29.2 | 194 | 197   | 49  |
| Frio          | 11.7% | 9.0%  | 25.3 | 252 | 248   | 71  |
| Gaines        | 21.7% | 11.3% | 9.6  | 237 | 228   | 223 |



|            |       |       |      |       |       |     |
|------------|-------|-------|------|-------|-------|-----|
| Galveston  | 45.8% | 16.3% | 20.5 | 51    | 141   | 121 |
| Garza      | 39.4% | 18.8% | 0.0  | 104   | 69    | 245 |
| Gillespie  | 26.4% | 11.2% | 19.0 | 219   | 231   | 148 |
| Glasscock  | 43.4% | 21.7% | 27.9 | 72    | 30    | 55  |
| Goliad     | 45.7% | 16.5% | 14.8 | 53    | 135   | 196 |
| Gonzales   | 40.3% | 21.9% | 17.8 | 95    | 29    | 163 |
| Gray       | 25.4% | 12.4% | 35.3 | 226   | 219   | 24  |
| Grayson    | 34.2% | 16.6% | 22.3 | 156   | 131   | 97  |
| Gregg      | 34.5% | 15.3% | 19.9 | 153   | 161   | 134 |
| Grimes     | 45.3% | 20.7% | 16.8 | 56    | 40    | 178 |
| Guadalupe  | 35.3% | 15.0% | 16.4 | 143   | 167   | 180 |
| Hale       | 39.2% | 19.9% | 24.1 | 106   | 55    | 81  |
| Hall       | 36.3% | 15.4% | 30.5 | 134   | 158.5 | 42  |
| Hamilton   | 33.3% | 17.8% | 3.9  | 167   | 91    | 234 |
| Hansford   | 26.9% | 12.9% | 29.6 | 216   | 210   | 47  |
| Hardeman   | 38.4% | 20.3% | 0.0  | 112   | 47    | 245 |
| Hardin     | 25.9% | 14.1% | 13.5 | 224   | 185   | 206 |
| Harris     | 45.3% | 18.0% | 17.3 | 55    | 85    | 168 |
| Harrison   | 39.7% | 17.3% | 23.2 | 101   | 107   | 87  |
| Hartley    | 26.1% | 16.7% | 15.4 | 221   | 123.5 | 189 |
| Haskell    | 38.8% | 19.3% | 58.8 | 110   | 63    | 6   |
| Hays       | 42.2% | 17.3% | 18.3 | 79    | 106   | 157 |
| Hemphill   | 28.1% | 15.8% | 16.9 | 210   | 151   | 176 |
| Henderson  | 33.1% | 15.4% | 30.1 | 168   | 157   | 46  |
| Hidalgo    | 40.4% | 16.8% | 20.2 | 94    | 119   | 125 |
| Hill       | 33.0% | 17.8% | 34.7 | 171   | 89    | 26  |
| Hockley    | 34.5% | 17.5% | 21.2 | 152   | 102   | 113 |
| Hood       | 37.9% | 15.9% | 24.4 | 122   | 149   | 79  |
| Hopkins    | 35.1% | 14.4% | 22.4 | 147   | 178   | 93  |
| Houston    | 37.9% | 15.2% | 15.8 | 119.5 | 165   | 186 |
| Howard     | 33.1% | 18.0% | 21.7 | 169   | 86    | 107 |
| Hudspeth   | 50.5% | 17.1% | 28.5 | 20    | 117   | 53  |
| Hunt       | 38.2% | 16.6% | 13.9 | 117   | 132   | 205 |
| Hutchinson | 23.1% | 9.5%  | 30.8 | 233   | 245   | 39  |
| Irion      | 35.5% | 14.0% | 43.3 | 141   | 189   | 15  |
| Jack       | 32.5% | 13.3% | 30.3 | 175   | 202   | 44  |
| Jackson    | 48.7% | 20.0% | 24.3 | 27    | 53    | 80  |
| Jasper     | 23.7% | 13.0% | 26.6 | 231   | 209   | 60  |
| Jeff Davis | 34.0% | 23.6% | 0.0  | 160   | 19    | 245 |
| Jefferson  | 35.2% | 16.0% | 19.7 | 145   | 148   | 137 |
| Jim Hogg   | 56.5% | 23.3% | 9.0  | 6     | 21    | 225 |
| Jim Wells  | 59.6% | 20.4% | 26.2 | 3     | 45    | 63  |

|           |       |       |      |     |       |     |
|-----------|-------|-------|------|-----|-------|-----|
| Johnson   | 32.3% | 17.2% | 21.6 | 179 | 111   | 109 |
| Jones     | 49.9% | 22.7% | 28.3 | 24  | 25    | 54  |
| Karnes    | 33.3% | 19.3% | 9.9  | 166 | 64    | 221 |
| Kaufman   | 35.2% | 16.7% | 22.4 | 144 | 128   | 92  |
| Kendall   | 27.4% | 12.9% | 14.9 | 214 | 211   | 194 |
| Kenedy    | 53.3% | 16.7% | 0.0  | 8   | 126.5 | 245 |
| Kent      | 30.4% | 23.2% | 45.4 | 192 | 22    | 13  |
| Kerr      | 37.3% | 17.4% | 18.7 | 128 | 104   | 149 |
| Kimble    | 38.3% | 20.6% | 10.6 | 115 | 42    | 219 |
| King      | 13.8% | 6.9%  | 0.0  | 251 | 252   | 245 |
| Kinney    | 33.5% | 18.0% | 22.3 | 163 | 84    | 96  |
| Kleberg   | 53.2% | 16.9% | 32.5 | 10  | 118   | 36  |
| Knox      | 47.3% | 26.1% | 0.0  | 37  | 8     | 245 |
| La Salle  | 36.3% | 19.4% | 6.5  | 133 | 62    | 230 |
| Lamar     | 44.6% | 20.0% | 18.4 | 60  | 54    | 156 |
| Lamb      | 37.4% | 15.3% | 24.8 | 125 | 163   | 75  |
| Lampasas  | 28.1% | 13.9% | 40.4 | 209 | 191.5 | 16  |
| Lavaca    | 46.7% | 20.6% | 13.2 | 43  | 41    | 207 |
| Lee       | 48.6% | 15.2% | 20.2 | 28  | 164   | 127 |
| Leon      | 37.9% | 18.2% | 26.6 | 121 | 80    | 61  |
| Liberty   | 37.5% | 16.5% | 24.6 | 124 | 134   | 76  |
| Limestone | 38.2% | 16.8% | 22.0 | 116 | 120   | 104 |
| Lipscomb  | 26.3% | 10.7% | 22.0 | 220 | 237   | 103 |
| Live Oak  | 43.6% | 20.4% | 38.1 | 67  | 44    | 18  |
| Llano     | 40.1% | 18.0% | 16.9 | 96  | 83    | 174 |
| Loving    | .     | .     | 0.0  |     |       | 245 |
| Lubbock   | 43.9% | 17.5% | 19.6 | 66  | 100   | 140 |
| Lynn      | 38.8% | 12.9% | 25.9 | 109 | 214   | 65  |
| Madison   | 44.8% | 20.8% | 17.1 | 58  | 37    | 171 |
| Marion    | 34.4% | 12.8% | 36.4 | 154 | 216   | 20  |
| Martin    | 27.9% | 17.8% | 15.3 | 213 | 92    | 193 |
| Mason     | 39.8% | 18.8% | 18.5 | 100 | 71    | 153 |
| Matagorda | 50.5% | 20.2% | 17.9 | 19  | 49    | 162 |
| Maverick  | 35.8% | 14.1% | 20.5 | 139 | 186   | 122 |
| McCulloch | 40.1% | 16.8% | 34.2 | 98  | 122   | 29  |
| McLennan  | 46.6% | 20.1% | 19.5 | 45  | 51    | 142 |
| McMullen  | 38.3% | 25.5% | 46.5 | 114 | 10    | 12  |
| Medina    | 42.3% | 20.2% | 18.6 | 78  | 50    | 150 |
| Menard    | 50.0% | 16.7% | 48.7 | 23  | 126.5 | 10  |
| Midland   | 32.4% | 16.1% | 20.3 | 176 | 144   | 124 |
| Milam     | 47.9% | 19.5% | 22.2 | 30  | 59    | 99  |
| Mills     | 44.9% | 16.0% | 17.1 | 57  | 146   | 172 |

|               |       |       |       |     |       |     |
|---------------|-------|-------|-------|-----|-------|-----|
| Mitchell      | 41.7% | 23.8% | 55.1  | 85  | 15    | 7   |
| Montague      | 21.1% | 9.8%  | 19.0  | 239 | 243   | 147 |
| Montgomery    | 35.3% | 15.0% | 17.0  | 142 | 169   | 173 |
| Moore         | 19.7% | 10.5% | 9.8   | 245 | 242   | 222 |
| Morris        | 41.0% | 14.7% | 29.2  | 90  | 174   | 50  |
| Motley        | 50.9% | 23.6% | 92.9  | 16  | 17    | 3   |
| Nacogdoches   | 32.5% | 13.8% | 20.2  | 174 | 194   | 129 |
| Navarro       | 31.8% | 16.1% | 19.7  | 185 | 145   | 139 |
| Newton        | 20.3% | 11.4% | 30.8  | 243 | 227   | 40  |
| Nolan         | 53.2% | 23.9% | 27.6  | 9   | 13    | 56  |
| Nueces        | 52.6% | 19.4% | 15.5  | 12  | 60    | 188 |
| Ochiltree     | 22.4% | 10.9% | 12.6  | 235 | 235   | 210 |
| Oldham        | 33.3% | 9.5%  | 19.1  | 165 | 244   | 146 |
| Orange        | 26.9% | 13.1% | 21.8  | 217 | 205   | 106 |
| Palo Pinto    | 28.4% | 13.8% | 21.1  | 207 | 193   | 116 |
| Panola        | 18.1% | 9.1%  | 21.0  | 249 | 247   | 117 |
| Parker        | 32.4% | 15.1% | 22.1  | 177 | 166   | 101 |
| Parmer        | 25.8% | 11.2% | 4.2   | 225 | 229.5 | 233 |
| Pecos         | 51.8% | 23.2% | 30.7  | 14  | 23    | 41  |
| Polk          | 39.7% | 17.4% | 35.8  | 102 | 103   | 21  |
| Potter        | 36.3% | 15.3% | 23.8  | 132 | 160   | 83  |
| Presidio      | 36.8% | 21.1% | 18.6  | 131 | 33    | 152 |
| Rains         | 32.9% | 13.1% | 20.3  | 172 | 204   | 123 |
| Randall       | 29.4% | 11.7% | 20.5  | 199 | 223   | 120 |
| Reagan        | 33.6% | 13.1% | 0.0   | 162 | 206   | 245 |
| Real          | 37.5% | 12.9% | 15.4  | 123 | 215   | 190 |
| Red River     | 42.8% | 18.4% | 34.3  | 74  | 77    | 28  |
| Reeves        | 47.9% | 8.4%  | 26.6  | 31  | 251   | 59  |
| Refugio       | 46.9% | 23.6% | 10.9  | 40  | 18    | 217 |
| Roberts       | 21.1% | 10.5% | 128.3 | 240 | 238   | 2   |
| Robertson     | 50.6% | 22.4% | 24.8  | 18  | 26    | 74  |
| Rockwall      | 27.9% | 13.1% | 15.5  | 212 | 207   | 187 |
| Runnels       | 49.4% | 23.3% | 33.4  | 25  | 20    | 30  |
| Rusk          | 34.0% | 14.8% | 14.8  | 159 | 172   | 197 |
| Sabine        | 20.0% | 11.2% | 21.1  | 244 | 229.5 | 115 |
| San Augustine | 28.0% | 14.2% | 3.0   | 211 | 182   | 235 |
| San Jacinto   | 34.9% | 18.0% | 16.2  | 149 | 82    | 183 |
| San Patricio  | 48.1% | 17.5% | 24.5  | 29  | 101   | 78  |
| San Saba      | 44.0% | 18.4% | 21.1  | 65  | 76    | 114 |
| Schleicher    | 29.0% | 14.7% | 23.6  | 202 | 173   | 86  |
| Scurry        | 47.5% | 26.2% | 29.4  | 35  | 7     | 48  |
| Shackelford   | 34.4% | 17.9% | 0.0   | 155 | 87    | 245 |

|              |       |       |      |       |       |     |
|--------------|-------|-------|------|-------|-------|-----|
| Shelby       | 21.7% | 12.3% | 11.7 | 236   | 220   | 213 |
| Sherman      | 23.0% | 11.1% | 0.0  | 234   | 232   | 245 |
| Smith        | 37.9% | 17.7% | 19.8 | 119.5 | 95    | 136 |
| Somervell    | 29.1% | 14.2% | 17.2 | 201   | 183   | 170 |
| Starr        | 31.0% | 12.6% | 19.7 | 188   | 217   | 138 |
| Stephens     | 41.9% | 17.8% | 15.4 | 82    | 88    | 191 |
| Sterling     | 40.1% | 13.9% | 33.1 | 97    | 191.5 | 32  |
| Stonewall    | 45.7% | 14.3% | 0.0  | 52    | 179.5 | 245 |
| Sutton       | 40.5% | 17.7% | 0.0  | 93    | 94    | 245 |
| Swisher      | 42.4% | 24.0% | 12.6 | 77    | 12    | 211 |
| Tarrant      | 36.1% | 18.2% | 18.4 | 136   | 81    | 154 |
| Taylor       | 39.3% | 17.4% | 22.2 | 105   | 105   | 100 |
| Terrell      | 28.6% | 14.3% | 0.0  | 204   | 179.5 | 245 |
| Terry        | 36.9% | 18.5% | 16.3 | 130   | 75    | 181 |
| Throckmorton | 45.5% | 22.2% | 0.0  | 54    | 28    | 245 |
| Titus        | 49.2% | 18.4% | 25.4 | 26    | 78    | 69  |
| Tom Green    | 47.6% | 16.8% | 20.2 | 34    | 121   | 128 |
| Travis       | 41.5% | 17.2% | 14.2 | 87    | 113   | 203 |
| Trinity      | 43.4% | 21.1% | 25.2 | 71    | 32    | 72  |
| Tyler        | 31.9% | 15.8% | 37.8 | 182   | 152   | 19  |
| Upshur       | 33.4% | 15.6% | 20.2 | 164   | 155   | 126 |
| Upton        | 42.6% | 25.9% | 0.0  | 76    | 9     | 245 |
| Uvalde       | 43.6% | 17.1% | 16.9 | 69    | 115   | 175 |
| Val Verde    | 30.3% | 14.5% | 14.2 | 193   | 177   | 204 |
| Van Zandt    | 34.8% | 15.6% | 25.4 | 151   | 154   | 70  |
| Victoria     | 52.0% | 16.3% | 23.9 | 13    | 139   | 82  |
| Walker       | 32.3% | 16.1% | 28.8 | 180   | 143   | 52  |
| Waller       | 38.6% | 17.6% | 31.6 | 111   | 97    | 38  |
| Ward         | 21.5% | 13.5% | 34.6 | 238   | 200   | 27  |
| Washington   | 46.9% | 17.6% | 14.5 | 41    | 98    | 198 |
| Webb         | 39.0% | 14.9% | 16.2 | 108   | 170   | 182 |
| Wharton      | 52.6% | 20.1% | 17.3 | 11    | 52    | 167 |
| Wheeler      | 26.8% | 13.4% | 6.2  | 218   | 201   | 231 |
| Wichita      | 30.9% | 12.4% | 32.7 | 189   | 218   | 34  |
| Wilbarger    | 38.4% | 19.2% | 30.4 | 113   | 65    | 43  |
| Willacy      | 50.3% | 20.4% | 20.5 | 21    | 46    | 119 |
| Williamson   | 37.3% | 16.0% | 14.5 | 126   | 147   | 200 |
| Wilson       | 32.7% | 14.8% | 21.5 | 173   | 171   | 111 |
| Winkler      | 29.5% | 18.5% | 0.0  | 198   | 73    | 245 |
| Wise         | 28.5% | 13.6% | 25.6 | 205   | 199   | 66  |
| Wood         | 32.3% | 15.0% | 12.4 | 178   | 168   | 212 |
| Yoakum       | 18.8% | 10.9% | 16.1 | 248   | 234   | 184 |
| Young        | 29.9% | 13.1% | 32.6 | 196   | 208   | 35  |

|        |       |       |      |    |    |     |
|--------|-------|-------|------|----|----|-----|
| Zapata | 47.8% | 22.3% | 9.0  | 32 | 27 | 226 |
| Zavala | 41.9% | 26.7% | 25.6 | 83 | 4  | 67  |

**Spearman correlation coefficient**

**0.02 -0.05**

**P value**

**0.73 0.45**

Pctini: percentage of clients with at least one dose of HPV vaccine given the demographic grouping.

Pctutd: Percentage of clients that are up to date on their HPV series given their demographic grouping and age of initiation.

Rate: HPV-related cancer incidence rate.

pctini\_rank: rank of % initiation.

pctutd\_rank: rank of % up-to-date.

rate\_rank: rank of cancer incidence rate.

eTable 4. Spearman Correlation Matrix Between HPV Vaccination Initiation, HPV Vaccination Up-to-Date Status, and HPV-Related Cancer Incidence Across All Counties for Male Individuals

| County    | pctini | pctutd | rate | pctini_rank | pctutd_rank | rate_rank |
|-----------|--------|--------|------|-------------|-------------|-----------|
| Anderson  | 28.2%  | 12.2%  | 12.8 | 183         | 207         | 135       |
| Andrews   | 37.3%  | 19.9%  | 11.1 | 102         | 38          | 160       |
| Angelina  | 41.7%  | 16.3%  | 13.5 | 60          | 118         | 122       |
| Aransas   | 32.7%  | 13.8%  | 20.0 | 140         | 177         | 45        |
| Archer    | 26.8%  | 12.5%  | 7.9  | 198         | 204         | 193       |
| Armstrong | 21.6%  | 5.0%   | 30.8 | 231         | 251         | 14        |
| Atascosa  | 40.7%  | 17.5%  | 10.0 | 70          | 94          | 173       |
| Austin    | 37.8%  | 17.3%  | 14.5 | 97          | 98          | 101       |
| Bailey    | 33.5%  | 15.8%  | 13.0 | 134         | 126         | 130       |
| Bandera   | 30.5%  | 13.5%  | 17.4 | 159         | 184         | 71        |
| Bastrop   | 43.8%  | 17.7%  | 13.0 | 47          | 87          | 131       |
| Baylor    | 44.3%  | 23.2%  | 27.8 | 42          | 13          | 21        |
| Bee       | 47.3%  | 19.0%  | 20.6 | 26          | 54          | 42        |
| Bell      | 27.6%  | 13.2%  | 14.8 | 188         | 190         | 96        |
| Bexar     | 40.1%  | 17.6%  | 11.8 | 75          | 89          | 149       |
| Blanco    | 28.0%  | 12.3%  | 14.3 | 186         | 206         | 103       |
| Borden    | 25.4%  | 19.0%  | 50.9 | 206         | 53          | 5         |
| Bosque    | 26.9%  | 13.3%  | 11.8 | 197         | 189         | 148       |
| Bowie     | 22.5%  | 12.5%  | 18.3 | 226         | 200         | 61        |
| Brazoria  | 41.5%  | 17.0%  | 13.7 | 64          | 105         | 117       |
| Brazos    | 44.3%  | 19.4%  | 13.8 | 43          | 43          | 114       |
| Brewster  | 23.0%  | 12.6%  | 5.9  | 219         | 198         | 212.5     |
| Briscoe   | 47.4%  | 11.7%  | 0.0  | 25          | 217         | 240       |
| Brooks    | 6.9%   | 2.1%   | 0.0  | 253         | 253         | 240       |
| Brown     | 37.1%  | 18.9%  | 14.1 | 104         | 57          | 108       |
| Burleson  | 44.3%  | 18.2%  | 9.8  | 44          | 73          | 177       |
| Burnet    | 40.8%  | 17.4%  | 15.3 | 69          | 97          | 92        |
| Caldwell  | 43.9%  | 18.8%  | 19.5 | 46          | 59          | 51        |
| Calhoun   | 49.4%  | 18.0%  | 12.1 | 15          | 80          | 144       |
| Callahan  | 38.2%  | 19.5%  | 9.6  | 91          | 42          | 181       |
| Cameron   | 46.5%  | 14.4%  | 10.2 | 31          | 158         | 172       |
| Camp      | 40.9%  | 16.5%  | 25.4 | 68          | 114         | 25        |
| Carson    | 22.4%  | 13.1%  | 4.5  | 228         | 193         | 221       |
| Cass      | 22.5%  | 11.3%  | 11.7 | 227         | 222         | 151       |
| Castro    | 34.6%  | 14.7%  | 8.9  | 127         | 153         | 187       |
| Chambers  | 39.7%  | 15.3%  | 18.1 | 81          | 138         | 63        |
| Cherokee  | 38.3%  | 17.4%  | 18.6 | 89          | 96          | 59        |
| Childress | 26.6%  | 14.0%  | 5.8  | 199         | 173         | 215       |
| Clay      | 28.9%  | 11.8%  | 21.3 | 178         | 212         | 39        |

|               |       |       |      |     |       |     |
|---------------|-------|-------|------|-----|-------|-----|
| Cochran       | 28.3% | 11.0% | 0.0  | 182 | 228   | 240 |
| Coke          | 46.5% | 19.1% | 30.6 | 30  | 51    | 15  |
| Coleman       | 37.4% | 19.3% | 13.3 | 100 | 46    | 126 |
| Collin        | 21.6% | 10.5% | 12.2 | 230 | 234   | 140 |
| Collingsworth | 19.8% | 12.5% | 10.6 | 237 | 202   | 170 |
| Colorado      | 32.1% | 17.0% | 18.7 | 146 | 104   | 55  |
| Comal         | 32.6% | 14.7% | 17.2 | 143 | 154   | 73  |
| Comanche      | 38.2% | 16.8% | 9.6  | 92  | 107   | 182 |
| Concho        | 37.4% | 14.6% | 8.5  | 99  | 155   | 191 |
| Cooke         | 25.8% | 12.8% | 8.7  | 201 | 195   | 188 |
| Coryell       | 20.9% | 10.2% | 16.9 | 235 | 235   | 81  |
| Cottle        | 56.5% | 34.8% | 45.9 | 4   | 2     | 7   |
| Crane         | 39.9% | 22.2% | 0.0  | 77  | 20    | 240 |
| Crockett      | 27.4% | 16.4% | 0.0  | 191 | 115   | 240 |
| Crosby        | 38.8% | 16.8% | 10.7 | 86  | 108   | 167 |
| Culberson     | 41.4% | 22.2% | 60.6 | 65  | 18.5  | 3   |
| Dallam        | 21.1% | 13.3% | 12.9 | 233 | 187.5 | 133 |
| Dallas        | 35.3% | 18.0% | 14.6 | 122 | 78    | 98  |
| Dawson        | 16.9% | 10.7% | 17.0 | 244 | 231   | 78  |
| DeWitt        | 43.2% | 18.9% | 9.4  | 53  | 58    | 184 |
| Deaf Smith    | 34.4% | 17.7% | 10.0 | 129 | 88    | 176 |
| Delta         | 32.6% | 11.9% | 35.6 | 141 | 210   | 10  |
| Denton        | 27.4% | 13.5% | 12.1 | 192 | 182   | 143 |
| Dickens       | 16.0% | 11.8% | 0.0  | 246 | 211   | 240 |
| Dimmit        | 77.8% | 24.6% | 7.6  | 1   | 11    | 196 |
| Donley        | 12.6% | 8.0%  | 19.0 | 250 | 246   | 54  |
| Duval         | 63.1% | 21.8% | 26.6 | 2   | 21    | 24  |
| Eastland      | 25.6% | 12.5% | 9.1  | 202 | 203   | 185 |
| Ector         | 31.9% | 17.4% | 10.9 | 148 | 95    | 166 |
| Edwards       | 28.1% | 14.4% | 0.0  | 184 | 161   | 240 |
| El Paso       | 46.2% | 17.5% | 8.7  | 33  | 92    | 189 |
| Ellis         | 35.4% | 16.5% | 14.1 | 120 | 113   | 107 |
| Erath         | 25.6% | 12.1% | 12.8 | 203 | 208   | 136 |
| Falls         | 45.7% | 23.5% | 11.9 | 38  | 12    | 147 |
| Fannin        | 31.6% | 14.4% | 10.0 | 150 | 160   | 175 |
| Fayette       | 32.5% | 13.5% | 11.5 | 145 | 185   | 155 |
| Fisher        | 54.5% | 28.1% | 31.2 | 7   | 5     | 13  |
| Floyd         | 47.3% | 22.3% | 17.0 | 27  | 17    | 77  |
| Foard         | 22.8% | 14.0% | 0.0  | 221 | 170   | 240 |
| Fort Bend     | 41.6% | 17.1% | 10.6 | 62  | 103   | 169 |
| Franklin      | 39.4% | 13.9% | 12.6 | 83  | 175   | 138 |
| Freestone     | 30.2% | 15.9% | 13.3 | 164 | 125   | 127 |

|            |       |       |      |     |     |     |
|------------|-------|-------|------|-----|-----|-----|
| Frio       | 11.6% | 9.4%  | 7.1  | 252 | 237 | 203 |
| Gaines     | 21.5% | 10.9% | 9.6  | 232 | 229 | 180 |
| Galveston  | 43.0% | 15.1% | 20.8 | 54  | 141 | 40  |
| Garza      | 34.6% | 18.4% | 0.0  | 126 | 67  | 240 |
| Gillespie  | 22.2% | 10.6% | 10.9 | 229 | 233 | 164 |
| Glasscock  | 39.7% | 18.4% | 0.0  | 80  | 68  | 240 |
| Goliad     | 40.5% | 15.0% | 13.5 | 72  | 146 | 123 |
| Gonzales   | 38.1% | 19.4% | 7.3  | 94  | 44  | 200 |
| Gray       | 23.7% | 12.5% | 18.6 | 217 | 199 | 57  |
| Grayson    | 31.8% | 16.2% | 17.4 | 149 | 120 | 70  |
| Gregg      | 32.6% | 14.4% | 17.4 | 144 | 159 | 69  |
| Grimes     | 44.4% | 21.3% | 19.3 | 40  | 27  | 53  |
| Guadalupe  | 33.6% | 14.8% | 13.5 | 133 | 148 | 124 |
| Hale       | 37.0% | 21.3% | 11.5 | 107 | 28  | 156 |
| Hall       | 28.9% | 11.4% | 0.0  | 177 | 221 | 240 |
| Hamilton   | 27.6% | 15.6% | 13.2 | 189 | 131 | 128 |
| Hansford   | 27.2% | 14.3% | 20.2 | 194 | 167 | 44  |
| Hardeman   | 48.0% | 27.0% | 60.1 | 24  | 7   | 4   |
| Hardin     | 24.3% | 13.6% | 16.9 | 215 | 178 | 80  |
| Harris     | 43.7% | 17.6% | 12.0 | 48  | 90  | 145 |
| Harrison   | 35.0% | 16.1% | 19.5 | 124 | 121 | 52  |
| Hartley    | 17.5% | 11.5% | 0.0  | 241 | 220 | 240 |
| Haskell    | 49.9% | 25.3% | 11.0 | 14  | 10  | 163 |
| Hays       | 40.4% | 18.1% | 13.8 | 73  | 75  | 115 |
| Hemphill   | 22.6% | 15.6% | 0.0  | 223 | 130 | 240 |
| Henderson  | 30.7% | 14.7% | 23.4 | 157 | 152 | 31  |
| Hidalgo    | 38.2% | 16.7% | 8.0  | 93  | 111 | 192 |
| Hill       | 29.5% | 16.1% | 27.9 | 171 | 124 | 20  |
| Hockley    | 30.7% | 15.4% | 19.9 | 156 | 137 | 46  |
| Hood       | 34.5% | 13.6% | 23.8 | 128 | 180 | 29  |
| Hopkins    | 36.2% | 17.7% | 12.9 | 114 | 86  | 134 |
| Houston    | 35.6% | 15.0% | 13.8 | 117 | 145 | 113 |
| Howard     | 32.8% | 17.5% | 11.4 | 138 | 93  | 157 |
| Hudspeth   | 52.9% | 18.1% | 18.6 | 9   | 74  | 58  |
| Hunt       | 37.0% | 16.4% | 18.6 | 108 | 116 | 60  |
| Hutchinson | 17.2% | 9.3%  | 10.6 | 242 | 239 | 168 |
| Irion      | 35.7% | 15.7% | 0.0  | 116 | 128 | 240 |
| Jack       | 29.2% | 11.8% | 19.6 | 173 | 213 | 49  |
| Jackson    | 48.6% | 19.8% | 6.3  | 19  | 39  | 209 |
| Jasper     | 19.6% | 11.1% | 11.0 | 238 | 225 | 162 |
| Jeff Davis | 25.8% | 18.0% | 0.0  | 200 | 81  | 240 |
| Jefferson  | 30.9% | 13.9% | 14.2 | 153 | 174 | 105 |



|           |       |       |      |     |     |     |
|-----------|-------|-------|------|-----|-----|-----|
| Jim Hogg  | 57.6% | 23.0% | 30.4 | 3   | 14  | 16  |
| Jim Wells | 55.8% | 20.4% | 11.3 | 5   | 35  | 158 |
| Johnson   | 29.0% | 15.6% | 13.1 | 176 | 129 | 129 |
| Jones     | 44.4% | 19.3% | 11.6 | 41  | 47  | 153 |
| Karnes    | 31.2% | 21.2% | 14.8 | 152 | 29  | 97  |
| Kaufman   | 32.8% | 16.1% | 16.0 | 139 | 123 | 89  |
| Kendall   | 25.1% | 10.8% | 12.0 | 209 | 230 | 146 |
| Kenedy    | 48.4% | 12.9% | 0.0  | 20  | 194 | 240 |
| Kent      | 25.0% | 8.3%  | 38.6 | 212 | 245 | 9   |
| Kerr      | 37.2% | 18.1% | 18.7 | 103 | 77  | 56  |
| Kimble    | 36.5% | 19.4% | 10.9 | 112 | 45  | 165 |
| King      | 33.3% | 11.1% | 0.0  | 135 | 226 | 240 |
| Kinney    | 35.8% | 15.5% | 7.4  | 115 | 132 | 198 |
| Kleberg   | 51.4% | 17.8% | 15.8 | 11  | 84  | 90  |
| Knox      | 48.0% | 21.6% | 10.0 | 23  | 24  | 174 |
| La Salle  | 31.3% | 15.5% | 6.0  | 151 | 135 | 211 |
| Lamar     | 39.8% | 18.0% | 16.2 | 78  | 82  | 87  |
| Lamb      | 39.2% | 19.6% | 17.5 | 84  | 41  | 68  |
| Lampasas  | 25.2% | 14.5% | 13.6 | 208 | 157 | 120 |
| Lavaca    | 43.3% | 20.1% | 15.6 | 52  | 37  | 91  |
| Lee       | 49.4% | 18.8% | 9.7  | 16  | 60  | 179 |
| Leon      | 32.6% | 14.9% | 9.7  | 142 | 147 | 178 |
| Liberty   | 34.7% | 16.1% | 13.6 | 125 | 122 | 121 |
| Limestone | 38.8% | 18.2% | 18.0 | 87  | 72  | 64  |
| Lipscomb  | 25.5% | 7.6%  | 0.0  | 205 | 247 | 240 |
| Live Oak  | 45.8% | 21.7% | 20.4 | 37  | 22  | 43  |
| Llano     | 42.0% | 18.3% | 23.7 | 59  | 69  | 30  |
| Loving    | .     | .     | 0.0  |     |     | 240 |
| Lubbock   | 40.6% | 16.6% | 11.6 | 71  | 112 | 154 |
| Lynn      | 41.0% | 19.1% | 22.8 | 66  | 52  | 33  |
| Madison   | 43.4% | 20.2% | 7.3  | 50  | 36  | 199 |
| Marion    | 30.4% | 14.4% | 27.3 | 162 | 164 | 22  |
| Martin    | 28.7% | 15.1% | 45.4 | 179 | 142 | 8   |
| Mason     | 28.0% | 13.1% | 5.3  | 185 | 192 | 216 |
| Matagorda | 48.3% | 18.5% | 17.1 | 21  | 64  | 75  |
| Maverick  | 35.3% | 15.0% | 4.6  | 121 | 143 | 219 |
| McCulloch | 30.8% | 14.7% | 26.9 | 155 | 150 | 23  |
| McLennan  | 43.5% | 19.2% | 17.7 | 49  | 50  | 67  |
| McMullen  | 22.7% | 4.5%  | 0.0  | 222 | 252 | 240 |
| Medina    | 38.2% | 19.3% | 6.0  | 90  | 48  | 210 |
| Menard    | 43.3% | 17.2% | 0.0  | 51  | 100 | 240 |
| Midland   | 30.4% | 16.3% | 12.2 | 160 | 119 | 142 |
| Milam     | 46.2% | 18.4% | 19.7 | 34  | 65  | 48  |

|               |       |       |      |     |      |     |
|---------------|-------|-------|------|-----|------|-----|
| Mills         | 41.5% | 17.8% | 6.3  | 63  | 83   | 208 |
| Mitchell      | 41.0% | 22.2% | 0.0  | 67  | 18.5 | 240 |
| Montague      | 17.1% | 8.4%  | 17.8 | 243 | 244  | 65  |
| Montgomery    | 33.6% | 14.4% | 14.0 | 132 | 162  | 109 |
| Moore         | 18.9% | 9.2%  | 1.9  | 239 | 241  | 225 |
| Morris        | 41.6% | 16.7% | 22.3 | 61  | 110  | 36  |
| Motley        | 32.9% | 30.0% | 22.2 | 137 | 3    | 37  |
| Nacogdoches   | 29.0% | 12.3% | 11.7 | 175 | 205  | 152 |
| Navarro       | 29.6% | 15.8% | 19.6 | 170 | 127  | 50  |
| Newton        | 16.1% | 9.4%  | 11.7 | 245 | 238  | 150 |
| Nolan         | 54.7% | 25.7% | 6.7  | 6   | 9    | 206 |
| Nueces        | 50.8% | 19.7% | 13.9 | 13  | 40   | 112 |
| Ochiltree     | 19.9% | 10.7% | 7.0  | 236 | 232  | 204 |
| Oldham        | 29.7% | 12.0% | 0.0  | 169 | 209  | 240 |
| Orange        | 23.1% | 11.2% | 21.6 | 218 | 224  | 38  |
| Palo Pinto    | 24.0% | 11.1% | 29.0 | 216 | 227  | 18  |
| Panola        | 15.0% | 7.0%  | 14.1 | 248 | 248  | 106 |
| Parker        | 30.1% | 14.7% | 17.1 | 165 | 151  | 76  |
| Parmer        | 24.4% | 11.5% | 4.2  | 213 | 219  | 222 |
| Pecos         | 44.3% | 21.7% | 3.1  | 45  | 23   | 223 |
| Polk          | 37.4% | 18.9% | 23.1 | 98  | 56   | 32  |
| Potter        | 32.0% | 14.3% | 19.8 | 147 | 166  | 47  |
| Presidio      | 36.2% | 20.5% | 0.0  | 113 | 34   | 240 |
| Rains         | 29.4% | 12.7% | 6.5  | 172 | 197  | 207 |
| Randall       | 27.3% | 11.7% | 12.5 | 193 | 216  | 139 |
| Reagan        | 33.1% | 12.5% | 22.5 | 136 | 201  | 35  |
| Real          | 29.7% | 16.4% | 12.9 | 168 | 117  | 132 |
| Red River     | 38.0% | 18.7% | 5.1  | 96  | 61   | 218 |
| Reeves        | 48.9% | 5.7%  | 14.6 | 18  | 250  | 99  |
| Refugio       | 49.4% | 21.6% | 0.0  | 17  | 25   | 240 |
| Roberts       | 22.5% | 15.5% | 0.0  | 225 | 133  | 240 |
| Robertson     | 45.7% | 19.0% | 11.2 | 39  | 55   | 159 |
| Rockwall      | 25.0% | 11.6% | 17.8 | 211 | 218  | 66  |
| Runnels       | 46.8% | 22.7% | 35.0 | 28  | 16   | 12  |
| Rusk          | 26.9% | 13.5% | 14.5 | 196 | 183  | 100 |
| Sabine        | 14.6% | 10.1% | 30.3 | 249 | 236  | 17  |
| San Augustine | 24.4% | 11.7% | 18.3 | 214 | 214  | 62  |
| San Jacinto   | 30.3% | 14.2% | 25.0 | 163 | 168  | 26  |
| San Patricio  | 46.6% | 17.7% | 16.9 | 29  | 85   | 79  |
| San Saba      | 40.2% | 22.8% | 8.7  | 74  | 15   | 190 |
| Schleicher    | 30.6% | 13.6% | 13.9 | 158 | 179  | 111 |
| Scurry        | 45.8% | 26.3% | 5.9  | 36  | 8    | 214 |

|              |       |       |      |     |       |       |
|--------------|-------|-------|------|-----|-------|-------|
| Shackelford  | 36.9% | 15.4% | 45.9 | 109 | 136   | 6     |
| Shelby       | 18.0% | 9.2%  | 7.7  | 240 | 240   | 195   |
| Sherman      | 22.8% | 9.0%  | 0.0  | 220 | 242   | 240   |
| Smith        | 36.6% | 18.2% | 14.4 | 111 | 71    | 102   |
| Somervell    | 28.5% | 13.6% | 16.3 | 180 | 181   | 86    |
| Starr        | 29.1% | 12.7% | 5.9  | 174 | 196   | 212.5 |
| Stephens     | 37.0% | 18.7% | 17.4 | 105 | 62    | 72    |
| Sterling     | 35.2% | 20.5% | 62.5 | 123 | 33    | 2     |
| Stonewall    | 38.0% | 14.1% | 64.9 | 95  | 169   | 1     |
| Sutton       | 36.9% | 18.4% | 0.0  | 110 | 66    | 240   |
| Swisher      | 40.0% | 20.7% | 9.5  | 76  | 32    | 183   |
| Tarrant      | 34.3% | 17.5% | 15.1 | 130 | 91    | 93    |
| Taylor       | 38.8% | 17.2% | 16.3 | 85  | 99    | 85    |
| Terrell      | 15.3% | 8.5%  | 35.5 | 247 | 243   | 11    |
| Terry        | 35.4% | 18.3% | 9.0  | 119 | 70    | 186   |
| Throckmorton | 37.0% | 14.0% | 16.0 | 106 | 172   | 88    |
| Titus        | 48.2% | 18.0% | 10.3 | 22  | 79    | 171   |
| Tom Green    | 46.2% | 16.9% | 13.7 | 32  | 106   | 118   |
| Travis       | 39.7% | 17.2% | 13.6 | 79  | 102   | 119   |
| Trinity      | 42.4% | 21.1% | 24.2 | 58  | 31    | 28    |
| Tyler        | 27.7% | 14.4% | 24.7 | 187 | 163   | 27    |
| Upshur       | 28.4% | 14.0% | 20.7 | 181 | 171   | 41    |
| Upton        | 42.8% | 27.0% | 0.0  | 55  | 6     | 240   |
| Uvalde       | 39.5% | 19.2% | 14.2 | 82  | 49    | 104   |
| Val Verde    | 27.0% | 14.4% | 7.1  | 195 | 165   | 202   |
| Van Zandt    | 29.9% | 13.8% | 15.1 | 166 | 176   | 94    |
| Victoria     | 51.4% | 17.2% | 16.5 | 10  | 101   | 84    |
| Walker       | 29.8% | 15.2% | 22.6 | 167 | 140   | 34    |
| Waller       | 38.7% | 18.1% | 16.6 | 88  | 76    | 83    |
| Ward         | 21.0% | 13.2% | 6.8  | 234 | 191   | 205   |
| Washington   | 42.5% | 16.8% | 15.0 | 57  | 109   | 95    |
| Webb         | 37.4% | 14.5% | 7.5  | 101 | 156   | 197   |
| Wharton      | 51.0% | 21.2% | 12.2 | 12  | 30    | 141   |
| Wheeler      | 22.6% | 13.5% | 13.7 | 224 | 186   | 116   |
| Wichita      | 27.6% | 11.3% | 13.9 | 190 | 223   | 110   |
| Wilbarger    | 33.6% | 18.6% | 3.0  | 131 | 63    | 224   |
| Willacy      | 53.1% | 34.9% | 5.1  | 8   | 1     | 217   |
| Williamson   | 35.4% | 15.5% | 13.4 | 118 | 134   | 125   |
| Wilson       | 30.9% | 15.2% | 7.8  | 154 | 139   | 194   |
| Winkler      | 25.4% | 13.3% | 4.6  | 207 | 187.5 | 220   |
| Wise         | 25.5% | 11.7% | 11.1 | 204 | 215   | 161   |
| Wood         | 30.4% | 14.7% | 16.8 | 161 | 149   | 82    |
| Yoakum       | 12.6% | 6.8%  | 17.2 | 251 | 249   | 74    |

|        |       |       |      |     |     |     |
|--------|-------|-------|------|-----|-----|-----|
| Young  | 25.0% | 15.0% | 28.6 | 210 | 144 | 19  |
| Zapata | 45.9% | 21.6% | 7.2  | 35  | 26  | 201 |
| Zavala | 42.7% | 28.4% | 12.7 | 56  | 4   | 137 |

**Spearman correlation coefficient** **0.07 0.06**

**P value** **0.25 0.38**

Pctini: percentage of clients with at least one dose of HPV vaccine given the demographic grouping.

Pctutd: Percentage of clients that are up to date on their HPV series given their demographic grouping and age of initiation.

Rate: HPV-related cancer incidence rate.

pctini\_rank: rank of % initiation.

pctutd\_rank: rank of % up-to-date.

rate\_rank: rank of cancer incidence rate.
