# Supplementary material for: Human Papillomavirus Vaccination and Human Papillomavirus–Related Cancer Rates
Source: PubMed Central journal article supplement (PMC11378004; doi:10.1001/jamanetworkopen.2024.31807), 2024-09-05
Supplement: jamanetwopen-e2431807-s002.pdf [file jamanetwopen-e2431807-s002.pdf]

## Data Sharing Statement

Adekanmbi. Human Papillomavirus Vaccination and Human Papillomavirus–Related Cancer Rates. *JAMA Netw Open*. Published September 05, 2024.

doi:10.1001/jamanetworkopen.2024.31807

### Data

**Data available:** No

### Additional Information

**Explanation for why data not available:** The data that support the findings of our study are available from the corresponding author upon reasonable request and with permission of the Texas Department of State Health Services.
